# Supplementary material
Source: Springer Nature journal article supplement (https://www.springermedizin.de/resource/supplementary/40169_2013_42_MOESM2_ESM.pdf/9675440)

**a**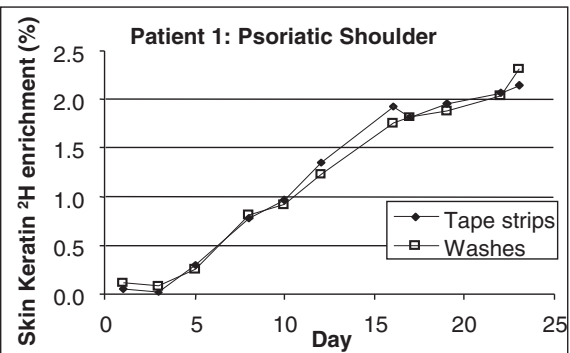**b****Psoriatic Shoulder**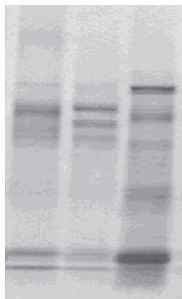

Wash-Pellet

Tape Strip

Wash-Soluble

Supplement: MOESM2 [file 9675440]
